# Supplementary material for: Aldehyde Dehydrogenase 2 Mediates Alcohol‐Induced Colorectal Cancer Immune Escape through Stabilizing PD‐L1 Expression
Source: PubMed Central journal article supplement (PMC8132160; doi:10.1002/advs.202003404), 2021-03-24
Supplement: ADVS-8-2003404-s001.pdf [file ADVS-8-2003404-s001.pdf]

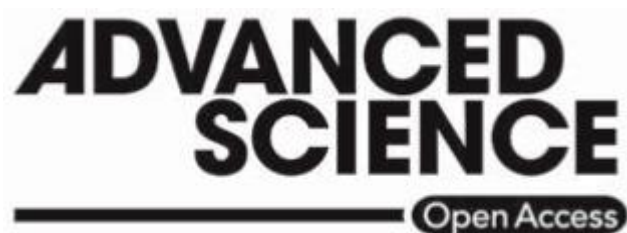

## Supporting Information

for *Adv. Sci.*, DOI: 10.1002/adv.202003404

Aldehyde dehydrogenase 2 mediates alcohol-induced  
colorectal cancer immune escape through stabilizing  
PD-L1 expression

*Hong Zhang\**, *Yuhui Xia\**, *Fang Wang\**, *Min Luo*, *Ke Yang*,  
*Shaobo Liang*, *Sainan An*, *Shaocong Wu*, *Chuan Yang*, *Da Chen*,  
*Meng Xu*, *Muyan Cai*, *Kenneth K W To*, *Liwu Fu*

### Supplementary figure 1

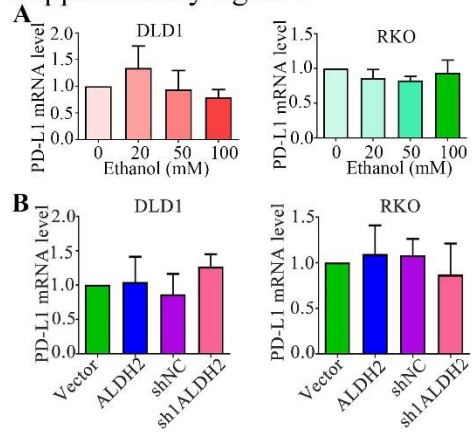

### Supplementary figure 2

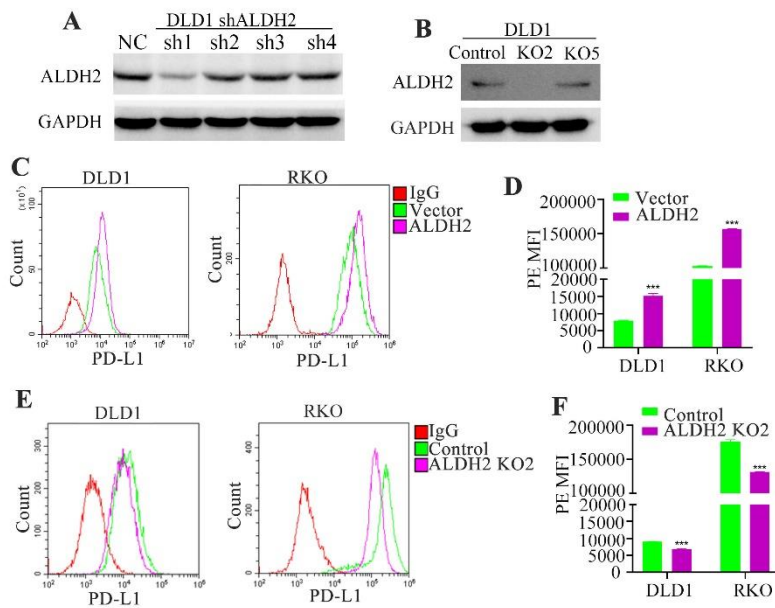

### Supplementary figure 3

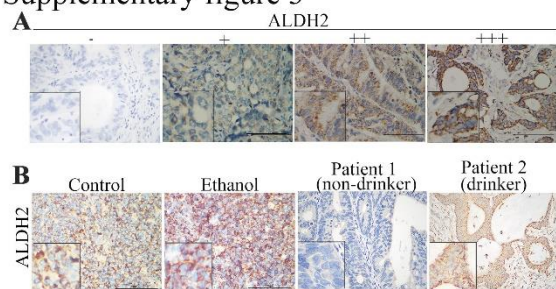

Supplementary figure 4

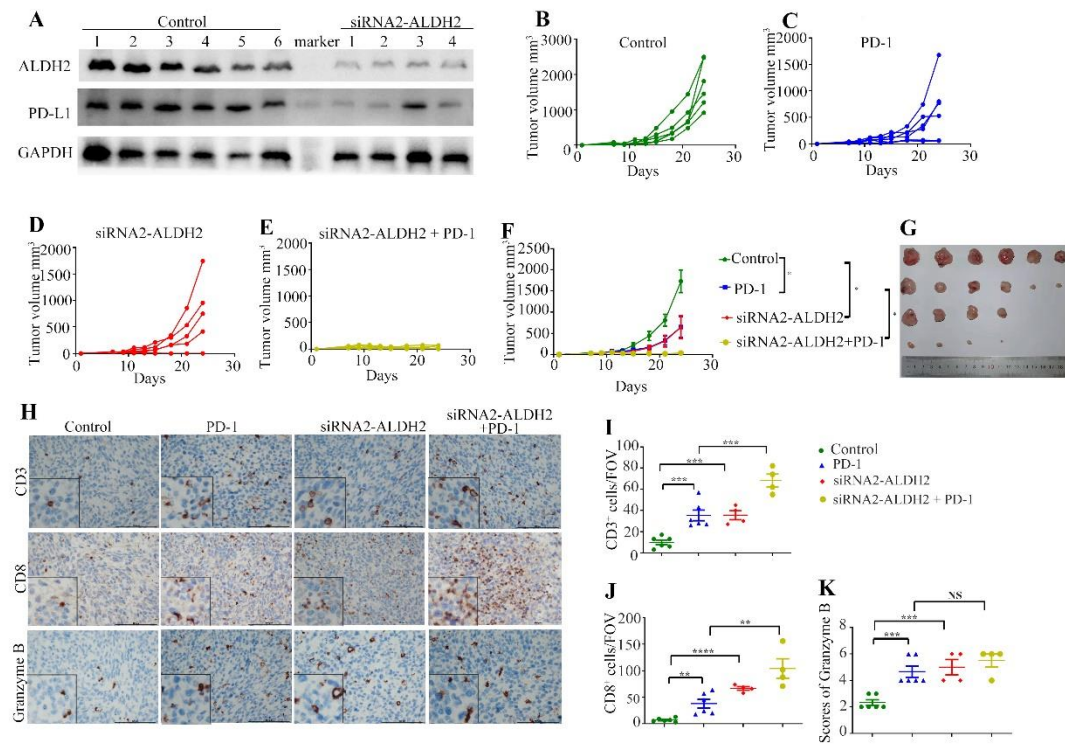

**Supplementary Table 1**

---

| <b>ALDH2 shRNA (human)</b> | <b>sequences</b>                                                      |
|----------------------------|-----------------------------------------------------------------------|
| sh1 ALDH2 F:               | 5'-CCGGGGACATGGTCCTCAAATGTCTCTCG<br>AGAGACATTTGAGGACCATGTCCTTTTTG-3'  |
| sh1 ALDH2 R:               | 5'-AATTCAAAAAGGACATGGTCCTCAAATGT<br>CTCTCGAGAGACATTTGAGGACCATGTCC-3'  |
| sh2 ALDH2 F:               | 5'-CCGGGCAGATCATTCCGTGGAATTTCTCG<br>AGAAATTCCACGGAATGATCTGCTTTTTG-3'  |
| sh2 ALDH2 R:               | 5'-AAttCAAAAAGCAGATCATTCCGTGGAATT<br>TCTCGAGAAATTCCACGGAATGATCTGC-3'  |
| sh3 ALDH2 F:               | 5'-CCGGGAAACGTGGTTGTGATGAAGGCTC<br>GAGCCTTCATCACAACCACGTTTCTTTTTG-3'  |
| sh3 ALDH2 R:               | 5'- AATTCAAAAAGAAACGTGGTTGTGATGAA<br>GGCTCGAGCCTTCATCACAACCACGTTTC-3' |
| sh4 ALDH2 F:               | 5'-CCGGGCAGATCATTCCGTGGAATTTCTCG<br>AGA-3'                            |
| sh4 ALDH2 R:               | 5'-AATTCCACGGAATGATCTGCTTTTTG-3'                                      |

---

**Supplementary Table 2**

---

| <b>ALDH2 shRNA (mouse)</b> | <b>sequences</b>                                                      |
|----------------------------|-----------------------------------------------------------------------|
| sh1 ALDH2 F:               | 5'-CCGGCCTGAAATGTCTCCGCTATTACTCG<br>AGTAATAGCGGAGACATTTTCAGGTTTTTG-3' |
| sh1 ALDH2 R:               | 5'-AATTCAAAAACCTGAAATGTCTCCGCTAT<br>TACTCGAGTAATAGCGGAGACATTTTCAGG-3' |
| sh2 ALDH2 F:               | 5'-CCGGCGGGCCAATGATTCTAAGTATCTCG<br>AGATACTTAGAATCATTGGCCCGTTTTTG-3'  |
| sh2 ALDH2 R:               | 5'-AATTCAAAAACGGGCCAATGATTCTAAGT<br>ATCTCGAGATACTTAGAATCATTGGCCCG-3'  |
| sh3 ALDH2 F:               | 5'-CCGGCCAGTGATGCAAATCCTCAAACCTCG<br>AGTTTGAGGATTTGCATCACTGGTTTTTG-3' |
| sh3 ALDH2 R:               | 5'-AATTCAAAAACCAGTGATGCAAATCCTCA<br>AACTCGAGTTTGAGGATTTGCATCACTGG-3'  |

---

**Supplementary Figure 1. PD-L1 mRNA expression.** **A**, qPCR validation of PD-L1 expression after treatment with alcohol at different concentrations for 48 h. **B**, Expression of PD-L1 mRNA in vector, ALDH2, shNC, and sh1 ALDH2-transfected DLD1 and RKO cells.

**Supplementary Figure 2. ALDH2 upregulated PD-L1 protein expression on cell membrane surface.** **A**, Western blot analysis showing the down-expression of ALDH2 by 4 different shRNA in DLD1 cells. **B**, Western blot analysis the effective knockout of ALDH2 by two sgRNA. **C, E**, Flow cytometry assay showing the cell membrane surface expression of PD-L1 after ectopic ALDH2 overexpression or deletion in DLD1 and RKO cells. **D, F**, Histograms showing the mean fluorescence intensity value (MFI)  $\pm$  SD values from three biological replicates in the flow cytometry assay. (Student's *t* test, \**P* < 0.05; \*\**P* < 0.01; \*\*\**P* < 0.001.)

**Supplementary Figure 3. IHC staining images showing the different ALDH2 protein expression in tumor tissues obtained from CRC patients.** **A**, Rating of IHC intensity staining comparing relative ALDH2 expression (-, +, ++, +++ representing negative, weak, intermediate and strong staining intensity, respectively). **B**, The expression of ALDH2 in tumor tissues of CRC patients with or without alcohol drinking history.

**Supplementary Figure 4. Another siRNA of ALDH2 enhanced efficacy of PD-1 blockade in CT26 tumor model.** **A**, Western blot analysis showing ALDH2 and PD-L1 protein expressions in tumor tissues from control and siRNA2-ALDH2 treated mice. **B-E**, Tumor volume of mice treated with control (n = 6), anti-PD-1 mAb (n = 6), siRNA2-ALDH2 (n = 6) and siRNA2-ALDH2 combined anti-PD-1 mAb therapy (n = 6) as indicated were measured every two days and plotted individually. **F**, The tumor volume curves of four different groups. **G**, Photo showing tumors excised from different treatment groups at termination of study. **H**, Representative IHC staining results of CD3, CD8, and granzyme B from four treatment groups as indicated. **I, J** The number of CD3 and CD8 positive cells per field of vision (FOV) in tumor tissues from IHC analysis (400 $\times$ ). **K**, The immunoreactivity score of granzyme B in tumor tissues of different treatment groups (400 $\times$ ). Error bars represent SD. (Student's *t* test, \**P* < 0.05; \*\**P* < 0.01; \*\*\**P* < 0.001; \*\*\*\**P* <

0.0001.)
